# Supplementary material for: Genome-wide structural variant analysis identifies risk loci for non-Alzheimer’s dementias
Source: PubMed Central journal article supplement — Cell Genom. 2023 May 4;3(6):100316. doi: 10.1016/j.xgen.2023.100316 (PMC10300553; doi:10.1016/j.xgen.2023.100316), 2023-05-04
Supplement: mmc1.pdf [file mmc1.pdf]

## Supplemental information

### Genome-wide structural variant analysis

#### identifies risk loci for non-Alzheimer's dementias

Karri Kaivola, Ruth Chia, Jinhui Ding, Memoona Rasheed, Masashi Fujita, Vilas Menon, Ronald L. Walton, Ryan L. Collins, Kimberley Billingsley, Harrison Brand, Michael Talkowski, Xuefang Zhao, Ramita Dewan, Ali Stark, Anindita Ray, Sultana Solaiman, Pilar Alvarez Jerez, Laksh Malik, Ted M. Dawson, Liana S. Rosenthal, Marilyn S. Albert, Olga Pletnikova, Juan C. Troncoso, Mario Masellis, Julia Keith, Sandra E. Black, Luigi Ferrucci, Susan M. Resnick, Toshiko Tanaka, The American Genome Center, International LBD Genomics Consortium, International ALS/FTD Consortium, PROSPECT Consortium, Eric Topol, Ali Torkamani, Pentti Tienari, Tatiana M. Foroud, Bernardino Ghetti, John E. Landers, Mina Ryten, Huw R. Morris, John A. Hardy, Letizia Mazzini, Sandra D'Alfonso, Cristina Moglia, Andrea Calvo, Geidy E. Serrano, Thomas G. Beach, Tanis Ferman, Neill R. Graff-Radford, Bradley F. Boeve, Zbigniew K. Wszolek, Dennis W. Dickson, Adriano Chiò, David A. Bennett, Philip L. De Jager, Owen A. Ross, Clifton L. Dalgard, J. Raphael Gibbs, Bryan J. Traynor, and Sonja W. Scholz

# **Genome-wide structural variant analysis identifies risk loci for non-Alzheimer dementias**

Karri Kaivola, Ruth Chia, Jinhui Ding, et al.

**Contents**

| <b>Supplementary Figures</b>                              | <b>Page</b> |
|-----------------------------------------------------------|-------------|
| Figure S1 .....                                           | 3           |
| Figure S2 .....                                           | 4           |
| Figure S3 .....                                           | 5           |
| Figure S4 .....                                           | 6           |
| Figure S5 .....                                           | 7           |
| Figure S6 .....                                           | 8           |
| Figure S7 .....                                           | 9           |
| Figure S8 .....                                           | 10          |
| <b>Supplementary Tables</b>                               |             |
| Table S1 .....                                            | 11          |
| Table S2 .....                                            | 12          |
| Table S3 .....                                            | 13          |
| Table S4 .....                                            | 14          |
| Table S5 .....                                            | 15          |
| Table S6 .....                                            | 16          |
| Table S7 .....                                            | 16          |
| Table S8 .....                                            | 16          |
| <b>Supplementary Information</b>                          |             |
| The American Genome Center .....                          | 17          |
| International LBD Genomics Consortium Investigators ..... | 17          |
| International ALS/FTD Consortium Members .....            | 22          |
| AMP-PD Acknowledgments .....                              | 24          |
| Acknowledgments for PDBP .....                            | 25          |

## Supplementary Figures

Figure S1 | Structural variant counts per structural variant type.

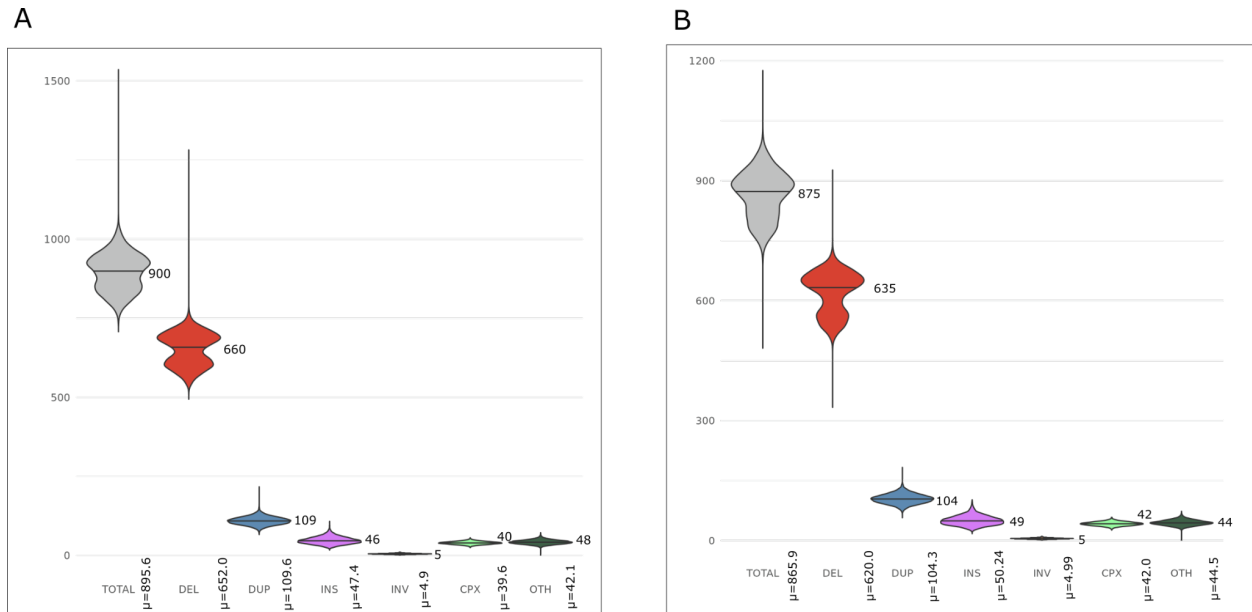

This figure shows the structural variant counts per variant type in the final filtered data used in the analyses. **(A)** shows the results for the LBD case-control cohort, and **(B)** illustrates the FTD/ALS case-control cohort counts. The horizontal line in each violin plot represents the median value and  $\mu$  refers to the mean. Abbreviations: DEL, deletions; DUP, duplications; INS, insertions; INV, inversions; CPX, complex structural variants; OTH, other structural variants. Related to Figure 2.

**Figure S2 | Structural variant size per structural variant type.**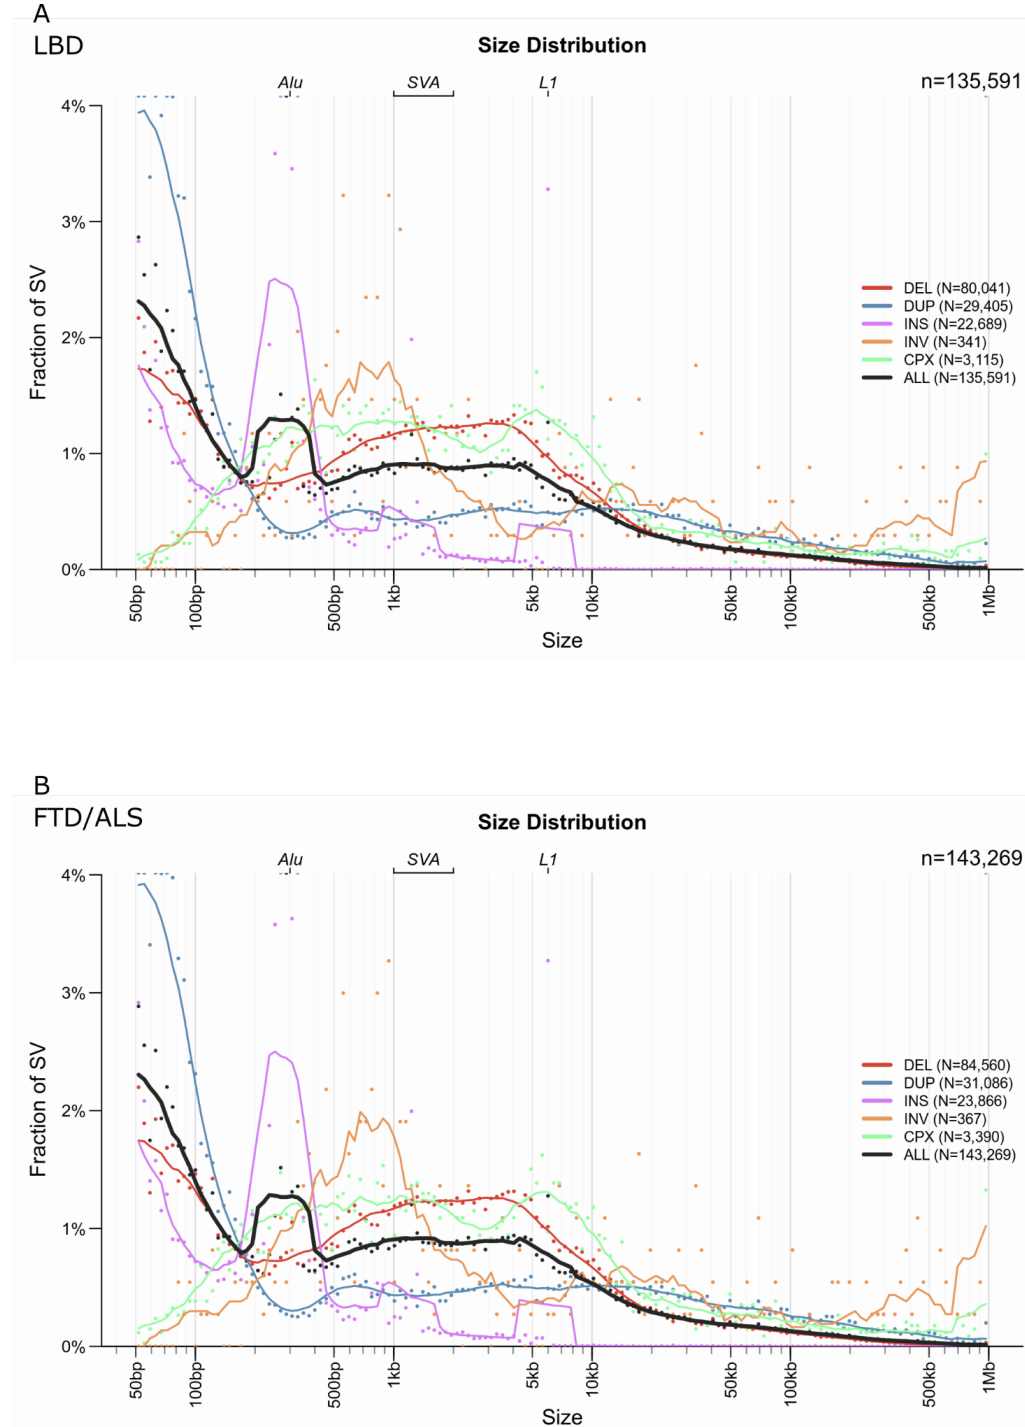

This figure shows the structural variant size for each variant type in the final filtered data used in the analyses. **(A)** shows the results for the LBD case-control cohort, and **(B)** illustrates the FTD/ALS case-control results. Abbreviations: DEL, deletions; DUP, duplications; INS, insertions; INV, inversions; CPX, complex structural variants; OTH, other structural variants. Related to Figure 2.

**Figure S3 | Structural variant size and structural variant allele frequency.**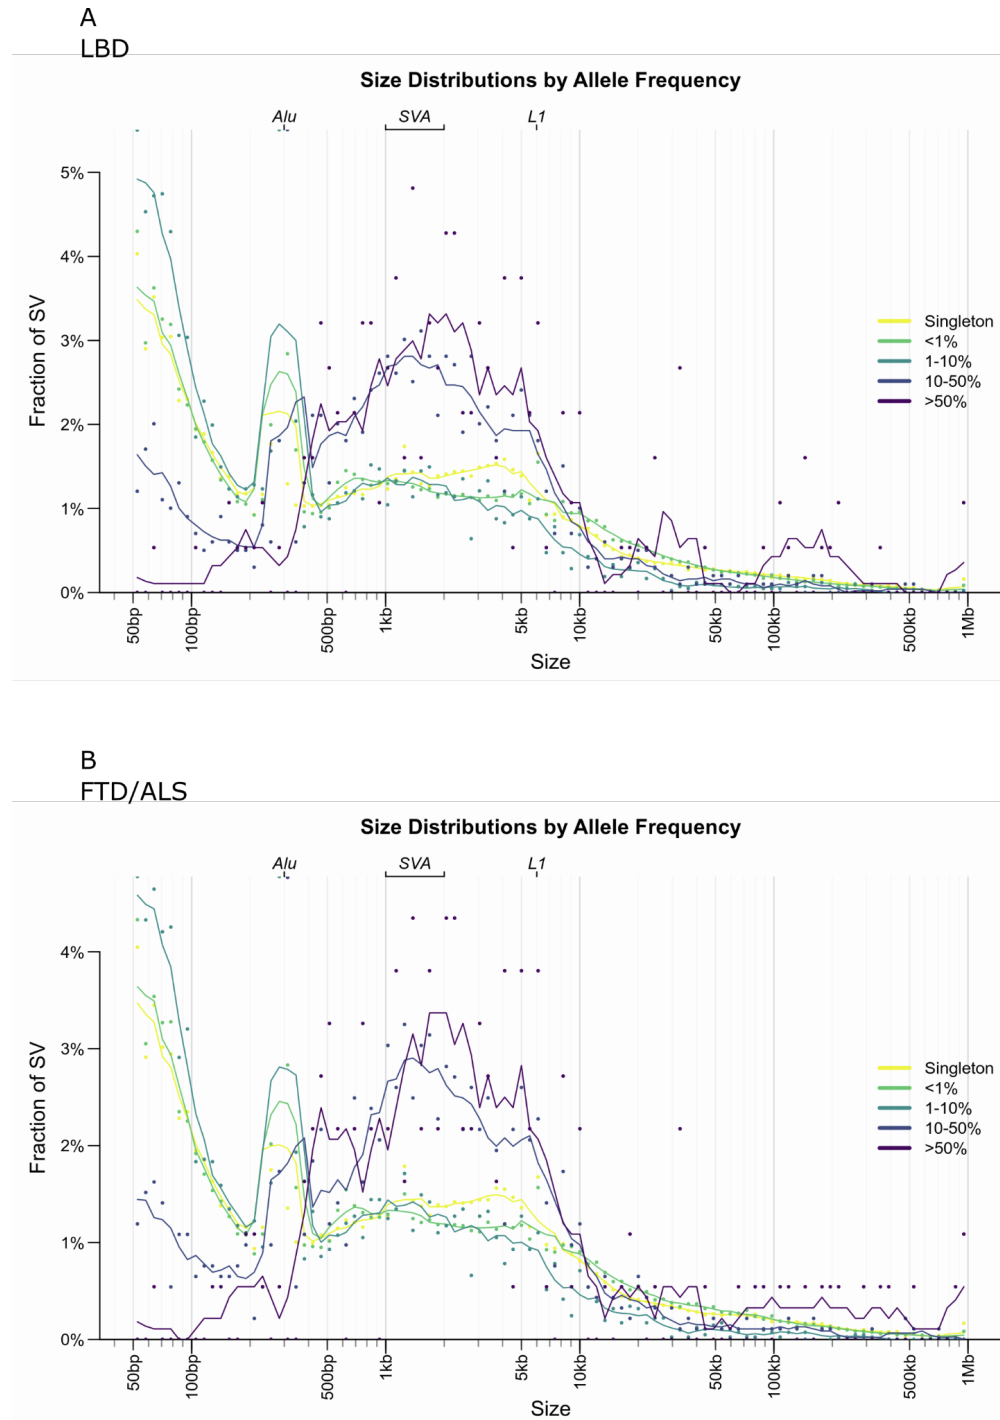

This figure shows the structural variant size per the structural variant allele frequency in the final filtered data used in the analyses. **(A)** shows the results for the LBD case-control cohort, and **(B)** illustrates the FTD/ALS case-control results. Increased frequencies are observed at ~300 bp, 1.2 kb, and 6kb, corresponding to abundant mobile elements in the human genome (Alu, SVA, L1). Related to Figure 2.

**Figure S4 | Descriptive statistics of unfiltered structural variants mapped by the GATK-SV pipeline in the study cohorts.**

**A**  
LBD

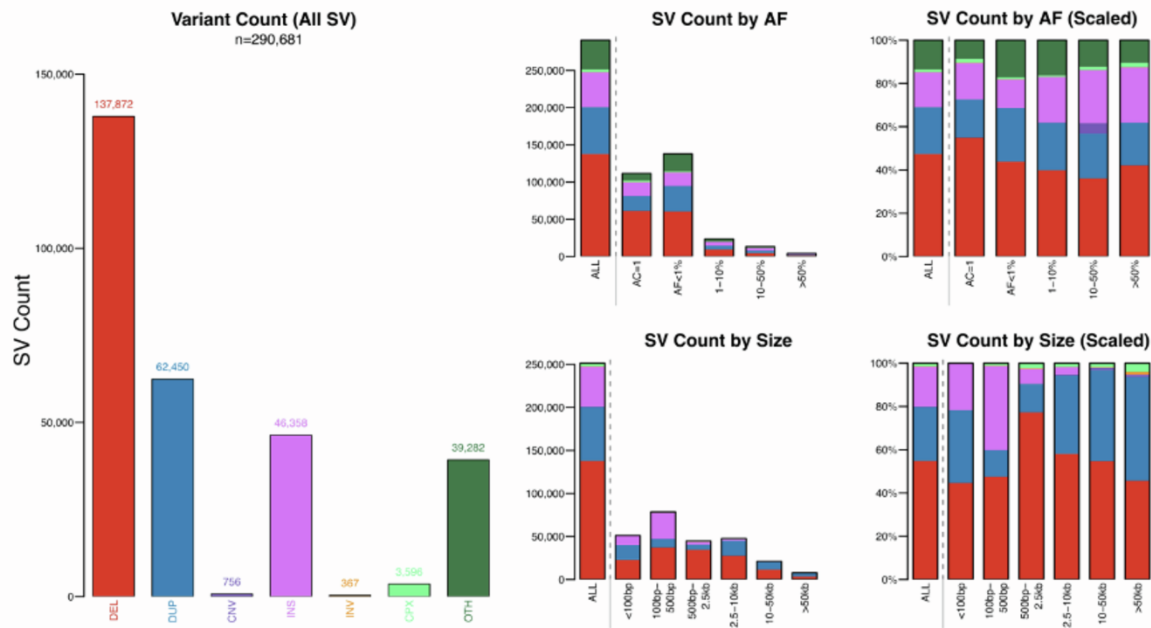

**B**  
FTD

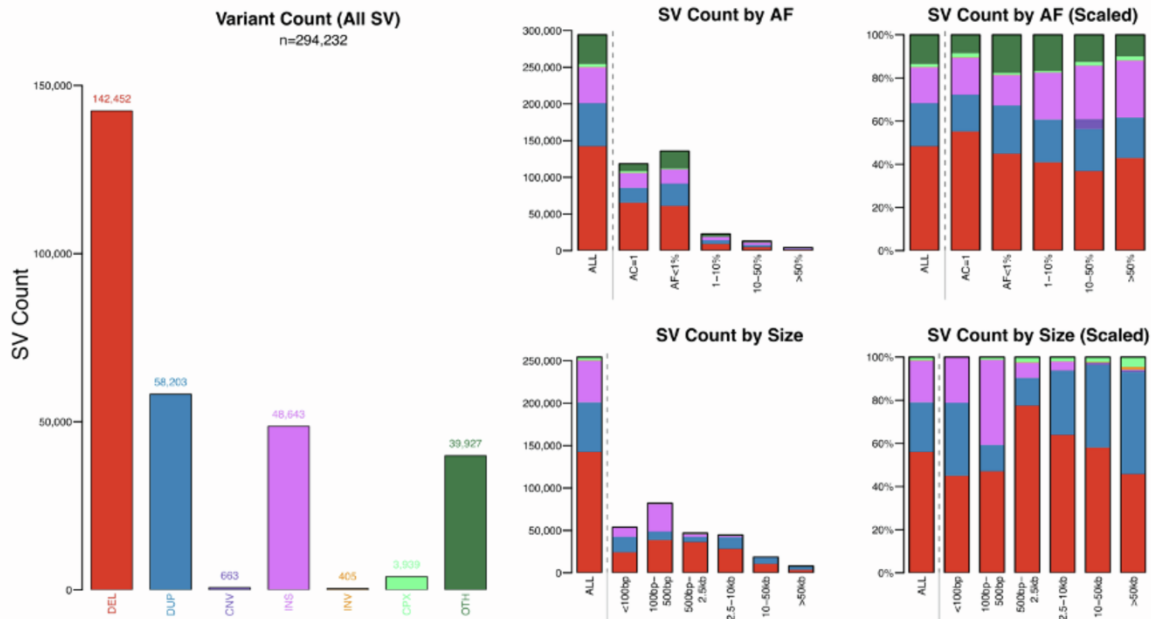

This figure shows the descriptive statistics of unfiltered structural variant calls in the LBD case-control cohort and the FTD-ALS case-control cohort. Related to Figure 2.

Figure S5 | Hardy-Weinberg equilibrium in the study cohorts.

## A LBD

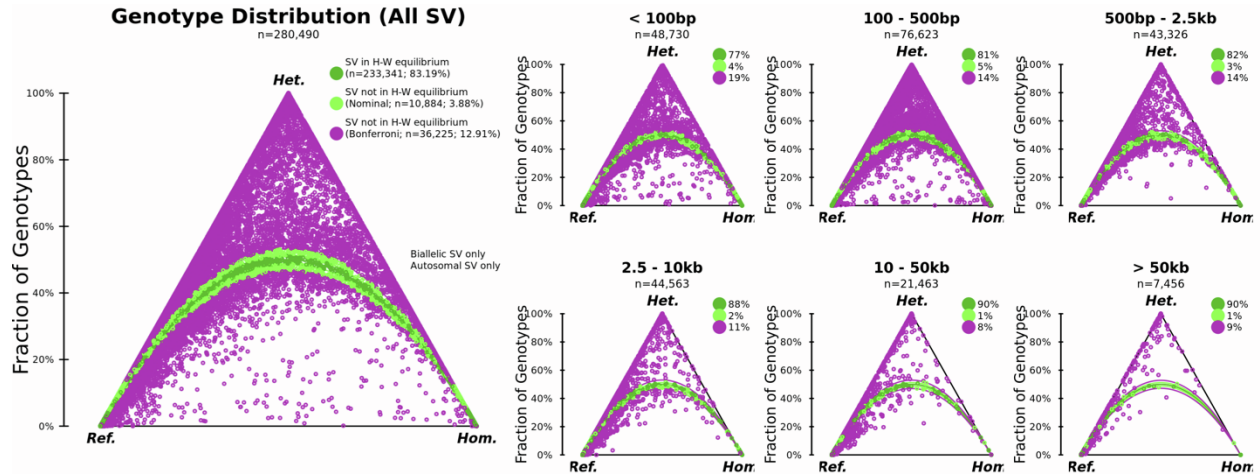

## B FTD/ALS

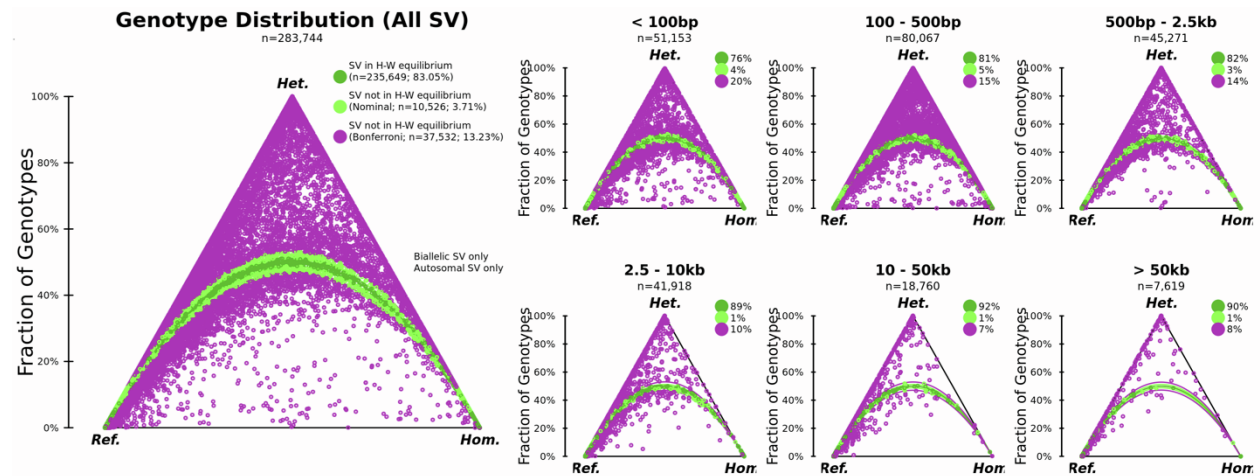

Distribution of the Hardy-Weinberg equilibrium of unfiltered structural variants identified in the LBD case-control cohort (A) and FTD/ALS case-control cohort (B) using the GATK-SV pipeline. Hardy-Weinberg equilibrium metrics refer to all biallelic structural variants localized to the autosomes. Deviation from Hardy-Weinberg equilibrium was assessed using a chi-square goodness-of-fit test with one degree of freedom. All sites are shaded according to their chi-squared  $p$ -values. The vertex labels reflect genotypes: Ref. denotes homozygous reference allele; Het. denotes heterozygous for the alternate allele; Hom. denotes homozygous for the alternate allele. Related to Figure 2.



Figure S6 | Characteristics of the unfiltered structural variants.

**A LBD**

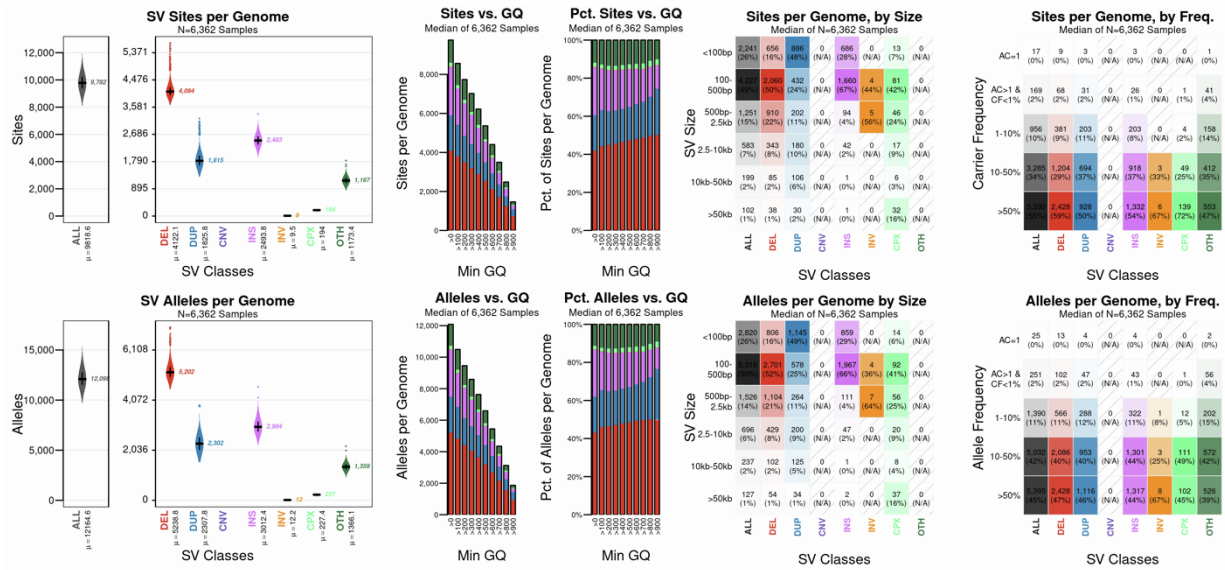

**B FTD/ALS**

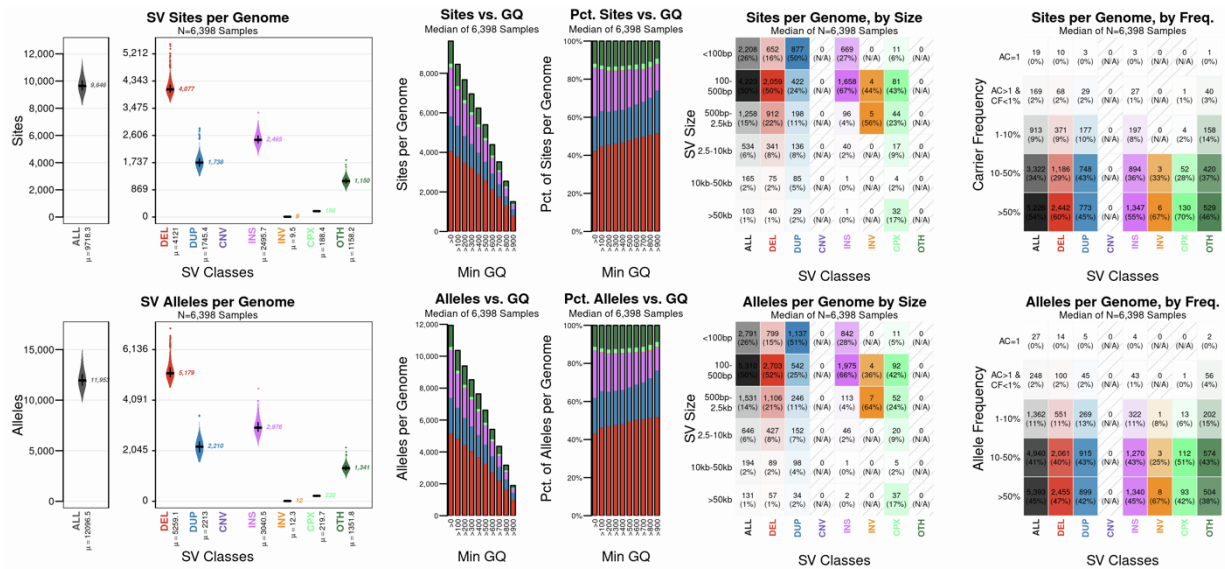

Structural variant site, quality, and allele frequency information of unfiltered structural variants in the LBD case-control cohort (A) and FTD/ALS case-control cohort (B). Related to Figure 2.

**Figure S7 | Validation of an *SNCA* duplication.**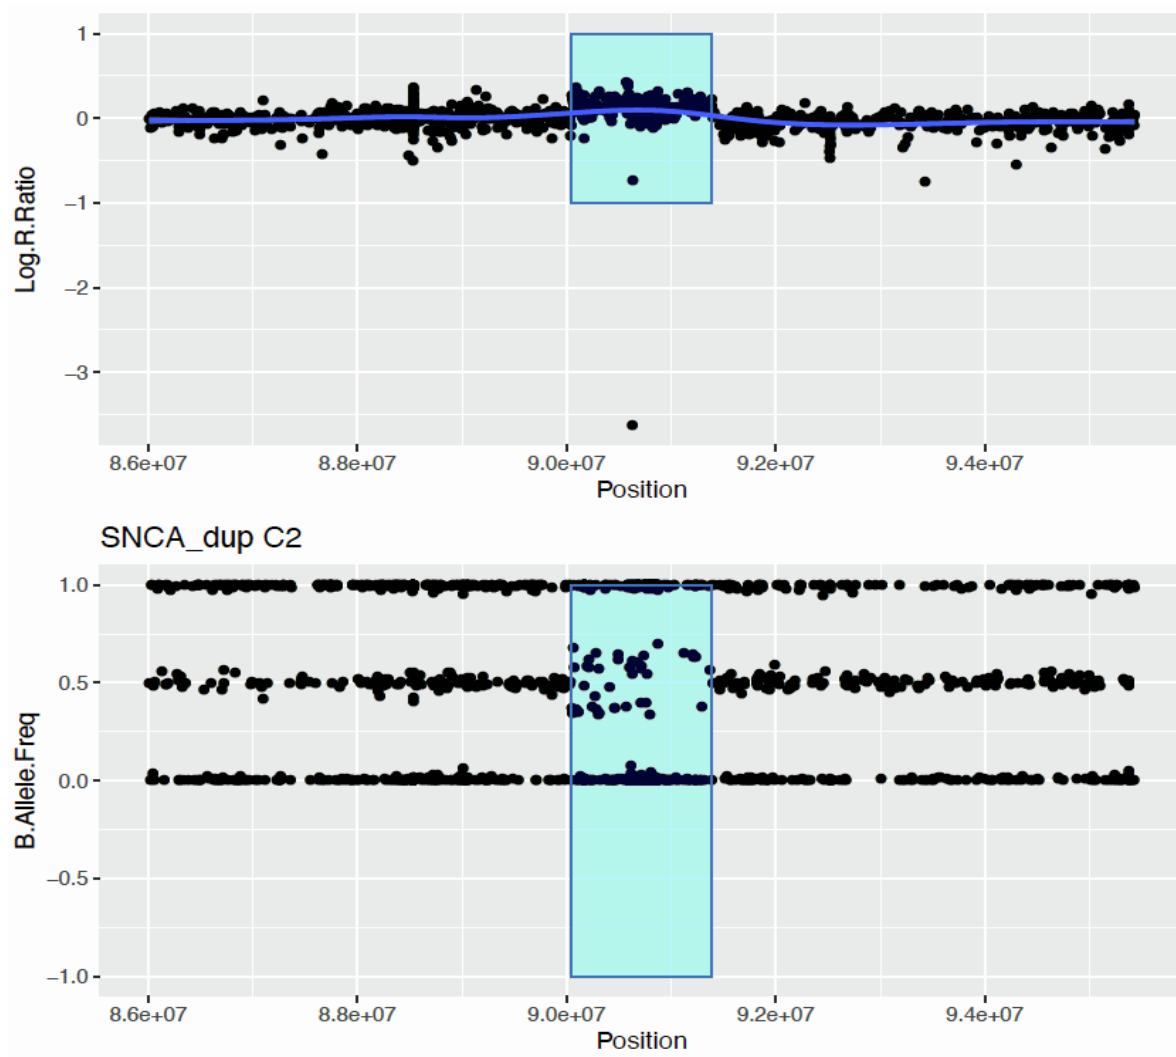

These plots are based on NeuroChip genotyping array data (Illumina). The characteristic double-band pattern of the B-allele frequency plot with a corresponding elevation in the log R ratio at the *SNCA* locus are consistent with a duplication. Related to Table 2.

**Figure S8 | Structural variant validation using the IGV-viewer.****A** *LRRK2* duplication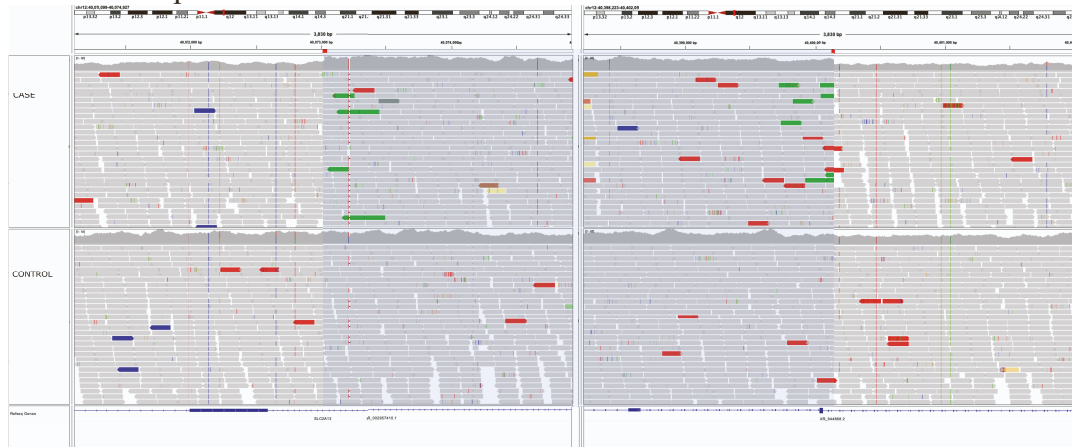**B** *OPTN* deletion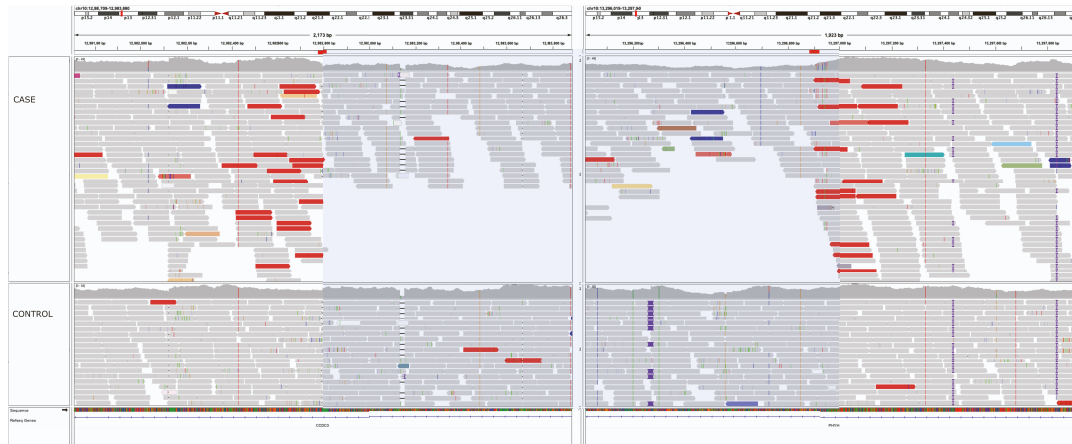**C** *FIG4* deletion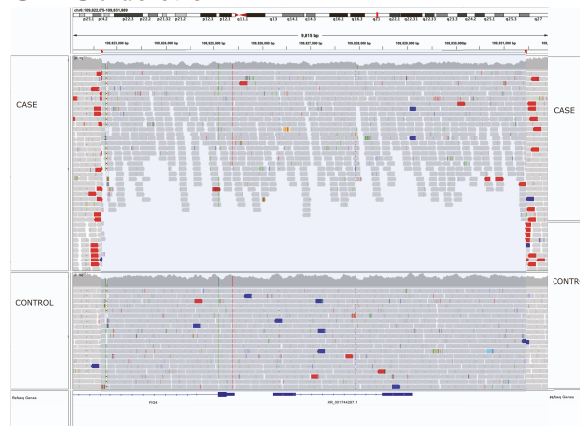**D** *CHCHD10* deletion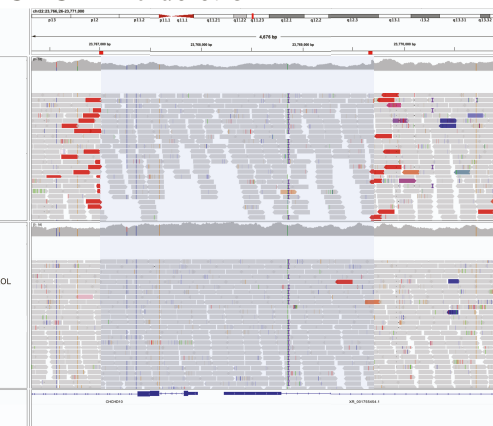

Structural variants in neurodegenerative disease genes were visualized in IGV-Viewer. **(A)** shows a duplication of the entire *LRRK2* gene that was present in a patient presenting with non-fluent primary progressive aphasia; **(B)** illustrates a deletion encompassing the entire *OPTN* gene in a patient with pathologically confirmed LBD; **(C)** and **(D)** show partial deletions of *FIG4* and *CHCHD10* in FTD/ALS cases. The upper pane of each panel shows the affected case, and the lower pane of each panel shows a control subject. Related to Table 2.

## Supplementary Tables

**Table S1. Descriptive statistics of filtered high-quality structural variants in the LBD case-control cohort and FTD/ALS case-control cohort.**

### A) Descriptive statistics according to structural variant type.

|                     | Deletion | Duplication | Insertion | Inversion | Unresolved variant | Complex variant |
|---------------------|----------|-------------|-----------|-----------|--------------------|-----------------|
| <b>LBD cases</b>    | 0.52*    | 0.20        | 0.16      | 0.0020    | 0.11*              | 0.019           |
| <b>LBD controls</b> | 0.53     | 0.20        | 0.15      | 0.0023    | 0.10               | 0.020           |
| <b>FTD cases</b>    | 0.52     | 0.20        | 0.16      | 0.0022    | 0.10               | 0.021           |
| <b>FTD controls</b> | 0.52     | 0.20        | 0.16      | 0.0023    | 0.10               | 0.020           |

The frequency of structural variants was compared between cases and controls for each variant type. \* denotes a *p*-value (based on a two-sided Fisher's test) less than 0.0083 (0.05/6 structural variant types). Related to Figure 2.

### B) Descriptive statistics according to structural variant length.

|                     | Unresolved | <100bp | 100bp-500bp | 500bp-2.5kb | 2.5kb-10kb | 10kb-50kb | >50kb |
|---------------------|------------|--------|-------------|-------------|------------|-----------|-------|
| <b>LBD cases</b>    | 0.060*     | 0.20   | 0.27        | 0.19        | 0.16       | 0.071*    | 0.049 |
| <b>LBD controls</b> | 0.057      | 0.20   | 0.27        | 0.19        | 0.16       | 0.077     | 0.048 |
| <b>FTD cases</b>    | 0.057      | 0.20   | 0.27        | 0.19        | 0.16       | 0.075     | 0.049 |
| <b>FTD controls</b> | 0.057      | 0.20   | 0.27        | 0.19        | 0.16       | 0.074     | 0.050 |

The frequency of structural variants were compared between cases and controls for each length group. \* denotes a *p*-value (based on a two-sided Fisher's test) less than 0.0071 (0.05/7 length groups). Abbreviation: bp = base-pairs. Related to Figure 2.

### C) Descriptive statistics according to structural variant allele frequency.

|                     | Singletons | <1%   | 1-10%  | 10-50% | >50%   |
|---------------------|------------|-------|--------|--------|--------|
| <b>LBD cases</b>    | 0.57*      | 0.37* | 0.053* | 0.013* | 0.002* |
| <b>LBD controls</b> | 0.58       | 0.38  | 0.039  | 0.009  | 0.002  |
| <b>FTD cases</b>    | 0.59*      | 0.35* | 0.046* | 0.011* | 0.002  |
| <b>FTD controls</b> | 0.57       | 0.38  | 0.038  | 0.009  | 0.002  |

The frequency of structural variants was compared between cases and controls per allele frequency group. \* denotes a *p*-value (based on a two-sided Fisher's test) less than 0.01 (0.05/5 allele frequency group). Related to Figure 2.

**Table S2. Precision (validation rate) and genotype concordance between structural variants called using the GATK-SV pipeline and Nanopore long-read sequencing in 20 samples.****A) Precision and concordance according to the variant call quality.**

|                     | <b>All variants</b> |                      | <b>High-quality variants</b> |                      |
|---------------------|---------------------|----------------------|------------------------------|----------------------|
|                     | Precision           | Genotype concordance | Precision                    | Genotype concordance |
| <b>Insertions</b>   | 69.1 %              | 61.2 %               | 60.8 %                       | 94.3 %               |
| <b>Deletions</b>    | 66.0 %              | 81.9 %               | 84.3 %                       | 92.0 %               |
| <b>Duplications</b> | 33.8 %              | 79.3 %               | 50.2 %                       | 89.2 %               |
| <b>Inversions</b>   | 32.1 %              | 86.5 %               | 52.4 %                       | 87.3 %               |

Related to STAR Methods.

**B) Precision and concordance according to the allele frequency of high-quality variants.**

|                     | <b>Minor allele frequency &lt;1%</b> |                      | <b>Minor allele frequency <math>\geq</math>1%</b> |                      |
|---------------------|--------------------------------------|----------------------|---------------------------------------------------|----------------------|
|                     | Precision                            | Genotype concordance | Precision                                         | Genotype concordance |
| <b>Insertions</b>   | 61.4%                                | 95.4%                | 61.6%                                             | 93.6%                |
| <b>Deletions</b>    | 79.5%                                | 91.4%                | 84.7%                                             | 92.1%                |
| <b>Duplications</b> | 43.3%                                | 89.0%                | 52.5%                                             | 89.3%                |
| <b>Inversions</b>   | 0 %                                  | 0 %                  | 53.2%                                             | 87.3%                |

Related to STAR Methods.

**Table S3. Comparison of the study cohort with recent structural variant publications.**

| Study                                | Sample N | SV mapping                        | SVs per genome     | SV type distribution (without BNDs)   | Median SV length | SVs with MAF < 1% | SVs in HWE | Validation rate against long-read sequencing* |
|--------------------------------------|----------|-----------------------------------|--------------------|---------------------------------------|------------------|-------------------|------------|-----------------------------------------------|
| <b>Collins et al., 2020</b>          | 14,891   | GATK-SV                           | 7,439 <sup>1</sup> | DEL ~50%<br>DUP ~15%<br>INS ~30%      | 331 bp           | ~90%              | ~80%       | n = 4<br>DEL 92%<br>DUP 94%<br>INS 97%        |
| <b>Abel et al., 2020</b>             | 14,623   | LUMPY, CNVnator, SVTyper, svtools | 4,442 <sup>2</sup> | DEL ~ 62 %<br>DUP ~ 16 %<br>INS NA    | NA               | ~90%              | NA         | n=9<br>DEL 87%<br>DUP 70%<br>INS NA           |
| <b>Billingsley et al., 2023</b>      | 7,772    | GATK-SV                           | 5,626 <sup>3</sup> | DEL ~53%<br>DUP ~21%<br>INS ~24%      | 329 bp           | NA                | NA         | n = 8<br>DEL NA<br>DUP NA<br>INS NA           |
| <b>Byrska-Bishop et al., 2022</b>    | 3,202    | GATK-SV, svtools, Absinthe        | 9,679              | DEL ~50%<br>DUP ~15%<br>INS ~ 30%     | NA               | ~80%              | ~75%       | n = 15<br>DEL 70%<br>DUP 4 %<br>INS 90%       |
| <b>This study (FTD case/control)</b> | 6,398    | GATK-SV                           | 9,646              | DEL ~ 55%<br>DUP ~ 25 %<br>INS ~ 20 % | 322 bp           | ~90%              | ~80%       | n = 20<br>DEL 84%<br>DUP 50%<br>INS 61%       |

\* filtering prior to variant validation and validation criteria varied considerably in each study

<sup>1</sup> SV calls in the Collins et al. manuscript excluded uncharacterized breakend variants

<sup>2</sup> SV calls in the Abel et al. manuscript from the public b38 call set

<sup>3</sup> SV calls in the Billingsley et al. manuscript excluded any variant that did not have the “PASS” label, which excludes “MULTIALLELIC” and “UNRESOLVED” variants (including uncharacterized breakend variants)

Related to STAR methods.

**Table S4. Expression quantitative trait loci information for the rs6489896 variant located in the chromosome 12q24.13 locus.**

| Cell type                       | Gene          | SNP       | Beta  | <i>p</i> -value            |
|---------------------------------|---------------|-----------|-------|----------------------------|
| Excitatory neurons              | <i>RITAI</i>  | rs6489896 | -0.35 | <b>9.8x10<sup>-8</sup></b> |
| Astrocytes                      | <i>TPCNI</i>  | rs6489896 | -0.21 | 0.0011                     |
| Excitatory neurons              | <i>TPCNI</i>  | rs6489896 | 0.18  | 0.0013                     |
| Oligodendrocytes                | <i>DTXI</i>   | rs6489896 | -0.40 | 0.0024                     |
| Oligodendroglia precursor cells | <i>RPH3A</i>  | rs6489896 | 0.32  | 0.0034                     |
| Inhibitory neurons              | <i>RITAI</i>  | rs6489896 | -0.31 | 0.0035                     |
| Excitatory neurons              | <i>PLBD2</i>  | rs6489896 | 0.15  | 0.0356                     |
| Inhibitory neurons              | <i>PLBD2</i>  | rs6489896 | 0.21  | 0.0439                     |
| Oligodendrocytes                | <i>SLC8B1</i> | rs6489896 | 0.22  | 0.0536                     |
| Endocytes                       | <i>PTPN11</i> | rs6489896 | -0.25 | 0.0615                     |

Data were generated using single-nucleus RNA-sequencing using brain tissue from the ROS/MAP collection. Bolded value denotes a significant *p*-value. Related to Figure 5C.

**Table S5. List of fifty genes associated with neurodegenerative diseases that were evaluated for structural variants.**

| Gene           | Chromosome | Start       | End         |
|----------------|------------|-------------|-------------|
| <i>PARK7</i>   | 1          | 6,961,711   | 8,985,505   |
| <i>TARDBP</i>  | 1          | 10,012,622  | 12,025,492  |
| <i>ATP13A2</i> | 1          | 15,985,958  | 18,011,972  |
| <i>PINK1</i>   | 1          | 19,633,458  | 21,651,511  |
| <i>DNAJC6</i>  | 1          | 64,264,694  | 66,415,869  |
| <i>GBA</i>     | 1          | 154,234,448 | 156,244,862 |
| <i>PSEN2</i>   | 1          | 225,870,572 | 227,896,103 |
| <i>TIA1</i>    | 2          | 69,209,444  | 71,248,641  |
| <i>DCTN1</i>   | 2          | 73,361,154  | 75,374,735  |
| <i>ALS2</i>    | 2          | 200,759,458 | 202,781,172 |
| <i>TUBA4A</i>  | 2          | 218,249,711 | 220,254,608 |
| <i>BSN</i>     | 3          | 48,554,477  | 50,671,549  |
| <i>CHMP2B</i>  | 3          | 86,227,263  | 88,255,548  |
| <i>SNCA</i>    | 4          | 88,724,099  | 90,836,976  |
| <i>MATR3</i>   | 5          | 138,273,752 | 140,331,677 |
| <i>CSF1R</i>   | 5          | 149,053,291 | 151,113,372 |
| <i>SQSTM1</i>  | 5          | 178,807,003 | 180,838,077 |
| <i>FIG4</i>    | 6          | 108,691,221 | 110,825,431 |
| <i>PARK2</i>   | 6          | 160,347,417 | 163,727,766 |
| <i>C9orf72</i> | 9          | 26,560,424  | 28,573,866  |
| <i>VCP</i>     | 9          | 34,056,066  | 36,072,668  |
| <i>SPTLC1</i>  | 9          | 91,031,999  | 93,115,376  |
| <i>SETX</i>    | 9          | 131,261,356 | 133,354,856 |
| <i>OPTN</i>    | 10         | 12,100,082  | 14,138,276  |
| <i>LRRK2</i>   | 12         | 39,224,997  | 41,369,284  |
| <i>HNRNPA1</i> | 12         | 53,280,690  | 55,285,246  |
| <i>KIF5A</i>   | 12         | 56,549,992  | 58,586,633  |
| <i>TBK1</i>    | 12         | 63,452,120  | 65,502,113  |
| <i>ATXN2</i>   | 12         | 110,452,214 | 112,599,673 |
| <i>GCH1</i>    | 14         | 53,842,006  | 55,902,824  |
| <i>PSEN1</i>   | 14         | 72,136,435  | 74,223,691  |
| <i>SPG11</i>   | 15         | 43,562,696  | 45,663,662  |
| <i>VPS13C</i>  | 15         | 60,852,391  | 63,060,465  |
| <i>POLG</i>    | 15         | 88,316,305  | 90,334,795  |
| <i>FUS</i>     | 16         | 30,180,110  | 32,194,871  |
| <i>VPS35</i>   | 16         | 45,657,979  | 47,689,232  |
| <i>PFN1</i>    | 17         | 3,945,650   | 5,949,086   |
| <i>GRN</i>     | 17         | 43,345,086  | 45,353,106  |
| <i>MAPT</i>    | 17         | 44,894,382  | 47,028,333  |
| <i>PANK2</i>   | 20         | 2,889,802   | 4,929,882   |
| <i>VAPB</i>    | 20         | 57,389,119  | 59,451,100  |
| <i>APP</i>     | 21         | 24,880,550  | 27,171,128  |
| <i>SOD1</i>    | 21         | 30,659,622  | 32,668,930  |
| <i>SYNJ1</i>   | 21         | 31,628,759  | 33,727,939  |
| <i>CHCHD10</i> | 22         | 22,765,834  | 24,767,972  |
| <i>FBXO7</i>   | 22         | 31,475,237  | 33,498,831  |
| <i>PLA2G6</i>  | 22         | 37,111,495  | 39,181,909  |
| <i>UBQLN2</i>  | X          | 55,563,593  | 57,567,010  |
| <i>TAF1</i>    | X          | 70,366,239  | 72,466,005  |
| <i>RAB39B</i>  | X          | 154,258,235 | 156,264,491 |

Chromosomal positions are shown according to hg38. Related to Table 2.



**Table S6. Structural variants in neurodegenerative disease genes.**

-> see attached [Table\\_S6.xlsx](#) file

Legend: The table lists the structural variants that were discovered in the study cohorts in fifty genes previously implicated in monogenic forms of neurodegeneration. Abbreviations: BAF, B allele frequency; BND, breakend variant; CPX, complex variant; DEL, deletion; DUP, duplication; INS, insertion; INV, inversion; ME, mobile element (Alu, LINE1, SVA); OTH, other variant; PE, paired-end read; RD, read depth; SR, split read.

**Table S7. Filtered structural variants in the study cohorts.**

-> see attached [Table\\_S7.xlsx](#) file

Legend: The table lists the structural variants in the study cohorts that were included in the analyses. Abbreviations: BAF, B allele frequency; BND, breakend variant; CPX, complex variant; DEL, deletion; DUP, duplication; INS, insertion; INV, inversion; ME, mobile element (Alu, LINE1, SVA); OTH, other variant; PE, paired-end read; RD, read depth; SR, split read.

**Table S8. Unfiltered structural variants identified by the GATK-SV pipeline.**

-> see attached [Table\\_S8.xlsx](#) file

Legend: The table lists the unfiltered structural variants in the LBD and FTD/ALS study cohorts. Abbreviations: BAF, B allele frequency; BND, breakend variant; CPX, complex variant; DEL, deletion; DUP, duplication; INS, insertion; INV, inversion; ME, mobile element (Alu, LINE1, SVA); OTH, other variant; PE, paired-end read; RD, read depth; SR, split read.

**Table S9. Demographics and clinical features of the LBD case-control cohort, the FTD/ALS case-control cohort and the replication case-control cohort.**

|                          | LBD              |                  | FTD/ALS           |                   | Replication     |                 |
|--------------------------|------------------|------------------|-------------------|-------------------|-----------------|-----------------|
|                          | Cases            | Controls         | Cases             | Controls          | Cases           | Controls        |
| <b>Sex, male (%)</b>     | 1,511<br>(64.2%) | 1,734<br>(46.9%) | 1,234<br>(53.5 %) | 1,720<br>(46.8 %) | 377<br>(67.9 %) | 147<br>(53.6 %) |
| <b>Mean age, years</b>   | 74               | 72               | 65                | 72                | 75              | 85              |
| <b>Median age, years</b> | 75               | 79               | 66                | 79                | 75              | 87              |

## Supplementary Notes

### The American Genome Center (TAGC)

Anthony R. Soltis,<sup>1</sup> Coralie Viollet,<sup>1</sup> Gauthaman Sukumar,<sup>1</sup> Camille Alba,<sup>1</sup> Nathaniel Lott,<sup>1</sup> Elisa McGrath Martinez,<sup>1</sup> Meila Tuck,<sup>1</sup> Jatinder Singh,<sup>1</sup> Dagmar Bacikova,<sup>1</sup> Xijun Zhang,<sup>1</sup> Daniel N. Hupalo,<sup>1</sup> Adelani Adeleye,<sup>1</sup> Matthew D. Wilkerson,<sup>1</sup> Harvey B. Pollard,<sup>1</sup> Clifton L. Dalgard,<sup>1,2</sup>

1. The American Genome Center, Collaborative Health Initiative Research Program, Uniformed Services University of the Health Sciences, Bethesda, MD 20814, USA.
2. Department of Anatomy, Physiology & Genetics, Uniformed Services University of the Health Sciences, Bethesda, MD 20814, USA.

### International LBD Genomics Consortium Members

(Principal investigators for individual study sites are separated by country)

**Canada:** Sandra E. Black (Institute of Medical Science, Faculty of Medicine, University of Toronto, Toronto, ON, Canada; Division of Neurology, Department of Medicine, University of Toronto, Toronto, ON, Canada; Heart and Stroke Foundation Canadian Partnership for Stroke Recovery, Sunnybrook Health Sciences Centre, University of Toronto, Toronto, ON, Canada; Hurvitz Brain Sciences Research Program, Sunnybrook Research Institute, University of Toronto, Toronto, ON, Canada; LC Campbell Cognitive Neurology Research Unit, Sunnybrook Research Institute, University of Toronto, Toronto, ON, Canada), Ziv Gan-Or (Montreal Neurological Institute and Hospital, Department of Neurology & Neurosurgery, McGill University, Montreal, Canada), Julia Keith (Department of Anatomical Pathology, Sunnybrook Health Sciences Centre, University of Toronto, Toronto, ON, Canada), Mario Masellis (Cognitive & Movement Disorders Clinic, Sunnybrook Health Sciences Centre, University of Toronto, Toronto, ON, Canada; Division of Neurology, Department of Medicine, University of Toronto, Toronto, ON, Canada; Hurvitz Brain Sciences Research Program, Sunnybrook Research Institute, University of Toronto, Toronto, ON, Canada; LC Campbell Cognitive Neurology Research Unit, Sunnybrook Research Institute, University of Toronto, Toronto, ON, Canada), Ekaterina Rogaeva (Tanz Centre for Research in Neurodegenerative Diseases, University of Toronto, Toronto, ON, Canada).

**France:** Alexis Brice (Sorbonne Universites, Institute Du Cerveau – Paris Brain Institute, Paris, France), Suzanne Lesage (Sorbonne Universites, Institute Du Cerveau – Paris Brain Institute, Paris, France).

**Greece:** Georgia Xiromerisiou (Department of Neurology, University of Thessalia, University Hospital of Larissa, Larissa, Greece).

**Italy:** Andrea Calvo (“Rita Levi Montalcini” Department of Neuroscience, University of Turin, Turin, Italy), Antonio Canosa (“Rita Levi Montalcini” Department of Neuroscience, University of Turin, Turin, Italy), Adriano Chio (“Rita Levi Montalcini” Department of Neuroscience, University of Turin, Turin, Italy; Institute of Cognitive Sciences and Technologies, C.N.R.,

Rome, Italy; Azienda Ospedaliero Universitaria Citta della Salute e della Scienza, Turin, Italy), Giancarlo Logrosino (Center for Neurodegenerative Diseases and the Aging Brain, University of Bari Aldo Moro At Pia Fondazione Panico Hospital-Tricase (LE), Bari, Italy), Gabriele Mora (ALS Center, Istituti Clinici Scientifici Maugeri, IRCCS Milano, Milan, Italy).

**Luxembourg:** Reijko Krüger (Luxembourg Center for Systems Biomedicine, University of Luxembourg, Esch-sur-Alzette, Luxembourg; Transversal Translational Medicine, Luxembourg Institute of Health, Strassen Luxembourg; Parkinson Research Clinic, Centre Hospitalier de Luxembourg, Luxembourg), Patrick May (Luxembourg Center for Systems Biomedicine, University of Luxembourg, Esch-sur-Alzette, Luxembourg).

**Spain:** Daniel Alcolea (Sant Pau Biomedical Institute, Hospital de la Santa Creu i Sant Pau, Universitat Autònoma de Barcelona, Barcelona, Spain; The Network Center for Biomedical Research in Neurodegenerative Diseases (CIBERNED), Madrid, Spain), Jordi Clarimon (Sant Pau Biomedical Research Institute, Hospital de la Santa Creu i Sant Pau, Universitat Autònoma de Barcelona, Barcelona, Spain; The Network Center for Biomedical Research in Neurodegenerative Diseases (CIBERNED), Madrid, Spain), Juan Fortea (Sant Pau Biomedical Research Institute, Hospital de la Santa Creu i Sant Pau, Universitat Autònoma de Barcelona, Barcelona, Spain; The Network Center for Biomedical Research in Neurodegenerative Diseases [CIBERNED], Madrid, Spain), Isabel Gonzalez-Aramburu (Institute for Research Marqués (IDIVAL), University of Cantabria and Department of Neurology, Marqués de Valdecilla Hospital, Santander, Spain; Centro de Investigación Biomédica en Red sobre Enfermedades Neurodegenerativas (CIBERNED), Madrid, Spain), Jon Infante (Institute for Research Marqués (IDIVAL), University of Cantabria and Department of Neurology, Marqués de Valdecilla Hospital, Santander, Spain; Centro de Investigación Biomédica en Red sobre Enfermedades Neurodegenerativas (CIBERNED), Madrid, Spain), Carmen Lage (Institute for Research Marqués (IDIVAL), University of Cantabria and Department of Neurology, Marqués de Valdecilla Hospital, Santander, Spain; Centro de Investigación Biomédica en Red sobre Enfermedades Neurodegenerativas (CIBERNED), Madrid, Spain), Alberto Lleó (Sant Pau Biomedical Research Institute, Hospital de la Santa Creu I Sant Pau, Universitat Autònoma de Barcelona, Barcelona, Spain; The Network Center for Biomedical Research in Neurodegenerative Diseases (CIBERNED), Madrid, Spain), Pau Pastor (Memory and Movement Disorders Units, Department of Neurology, University Hospital Mutua de Terrassa, Barcelona, Spain), Pascual Sanchez-Juan (Institute for Research Marqués (IDIVAL), University of Cantabria and Department of Neurology, Marqués de Valdecilla Hospital, Santander, Spain; Centro de Investigación Biomédica en Red sobre Enfermedades Neurodegenerativas (CIBERNED), Madrid, Spain).

**Republic of Ireland:** Francesca Brett (Dublin Brain Bank, Neuropathology Department, Beaumont Hospital, Dublin, Ireland).

**United Kingdom:** Dag Aarsland (Institute of Psychiatry, Psychology and Neuroscience [IoPPN], King's College London, London, UK), Safa Al-Sarraj (Department of Clinical Neuropathology, King's College Hospital and London Neurodegenerative Diseases Brain Bank, Institute of Psychiatry, Psychology and Neuroscience [IoPPN], King's College London, London, UK), Johannes Attems (Translational and Clinical Research Institute, Campus for Ageing and

Vitality, Newcastle University, Newcastle upon Tyne, UK), Steve Gentleman (Neuropathology Unit, Department of Brain Sciences, Imperial College London, London, UK), John A. Hardy (Department of Neurodegenerative Disease, UCL Queen Square Institute of Neurology, Queen Square, London, UK; UK Dementia Research Institute at University College London, UCL Institute of Neurology, University College London, London, UK; Reta Lila Weston Institute, UCL Queen Square Institute of Neurology, London, UK; UCL Movement Disorders Centre, University College London, London, UK), Angela K. Hodges (Institute of Psychiatry, Psychology and Neuroscience [IoPPN], King's College London, London, UK), Seth Love (Dementia Research Group, School of Clinical Sciences, University of Bristol, Southmead Hospital, Bristol, UK), Ian G. McKeith (Translational and Clinical Research Institute, Campus for Ageing and Vitality, Newcastle University, Newcastle upon Tyne, UK), Christopher M. Morris (Translational and Clinical Research Institute, Campus for Ageing and Vitality, Newcastle University, Newcastle upon Tyne, UK), Huw R. Morris (Department of Clinical and Movement Neuroscience, UCL Queen Square Institute of Neurology, University College London, London, UK), Laura Palmer (South West Dementia Brain Bank, University of Bristol, Southmead Hospital, Bristol, UK), Stuart Pickering-Brown (Division of Neuroscience and Experimental Psychology, Faculty of Biology, Medicine and Health, The University of Manchester, Manchester, UK), Mina Ryten (NIHR Great Ormond Street Hospital Biomedical Research Centre, University College London, London, UK; Genetics and Genomic Medicine, Great Ormond Street Institute of Child Health, University College London, London, UK), Alan J. Thomas (Biomedical Research Building, Campus for Aging and Vitality, Newcastle University, Newcastle upon Tyne, UK), Claire Troakes (Institute of Psychiatry, Psychology and Neuroscience (IoPPN), King's College London, London, UK).

**United States of America:** Marilyn S. Albert (Department of Neurology, Johns Hopkins University Medical Center, Baltimore, MD, USA), Matthew J. Barrett (Department of Neurology, University of Virginia School of Medicine, Charlottesville, VA, USA), Thomas G. Beach (Banner Sun Health Research Institute, Sun City, AZ, USA), Lynn M. Bekris (Genomic Medicine Institute, Cleveland Clinic, Cleveland, OH, USA), David A. Bennett (Rush Alzheimer's Disease Center, Chicago, IL, USA), Bradley F. Boeve (Department of Neurology, Mayo Clinic, Rochester, MN, USA), Clifton L. Dalgard (Department of Anatomy, Physiology and Genetics, Uniformed Services University of the Health Sciences, Bethesda, MD, USA), Ted M. Dawson (Department of Neurology, Johns Hopkins University Medical Center, Baltimore, MD, USA; Neuroregeneration and Stem Cell Programs, Institute of Cell Engineering, Johns Hopkins University School of Medicine, Baltimore, MD, USA; Department of Pharmacology and Molecular Science, Johns Hopkins University School of Medicine, Baltimore, MD, USA; Solomon H. Snyder Department of Neuroscience, Johns Hopkins University School of Medicine, Baltimore, MD, USA), Dennis W. Dickson (Department of Neuroscience, Mayo Clinic, Jacksonville, FL, USA), Kelley Faber (Indiana University School of Medicine, Indianapolis, IN, USA), Tanis Ferman (Department of Psychiatry and Psychology, Mayo Clinic, Jacksonville, FL, USA), Luigi Ferrucci (Longitudinal Studies Section, National Institute on Aging, Baltimore, MD, USA), Margaret E. Flanagan (Northwestern University Feinberg School of Medicine, Chicago, IL, USA), Tatiana M. Foroud (Indiana University School of Medicine, Indianapolis, IN, USA), Bernardino Ghetti (Department of Pathology and Laboratory Medicine, Indiana University School of Medicine, Indianapolis, IN, USA), J. Raphael Gibbs (Laboratory of Neurogenetics, National Institute on Aging, MD, USA), Alison Goate (Ronald M. Loeb Center

for Alzheimer's disease, Nash Family Department of Neuroscience, Department of Genetics and Genomic Science, and Department of Pathology, Icahn School of Medicine at Mount Sinai, New York, NY, USA), David S. Goldstein (Clinical Neurocardiology Section, National Institute of Neurological Disorders and Stroke, Bethesda, MD, USA), Neill R. Graff-Radford (Department of Neurology, Mayo Clinic Florida, Jacksonville, FL, USA), Horacio Kaufmann (Department of Neurology, New York University School of Medicine, NY, USA), Walter A. Kukull (National Alzheimer's Coordinating Center (NACC), University of Washington, Seattle, WA, USA), James B. Leverenz (Cleveland Lou Ruvo Center for Brain Health, Neurological Institute, Cleveland Clinic, OH, USA), Grisel Lopez (Medical Genetics Branch, National Human Genome Research Institute, Bethesda, MD, USA), Qinwen Mao (Northwestern University Feinberg School of Medicine, Chicago, IL, USA), Eliezer Masliah (Laboratory of Neurogenetics, National Institute on Aging, Bethesda, MD, USA), Edwin Monuki (University of California Irvine, Irvine, CA, USA), Kathy L. Newell (Department of Pathology and Laboratory Medicine, Indiana University School of Medicine, Indianapolis, IN, USA), Jose-Alberto Palma (Department of Neurology, New York University School of Medicine, NY, USA), Matthew Perkins (Department of Neurology, Michigan Medicine, University of Michigan, Ann Arbor, MI, USA), Olga Pletnikova (Department of Pathology and Anatomical Sciences, Jacobs School of Medicine and Biomedical Sciences, University at Buffalo, Buffalo, NY, USA), Alan E. Renton (Ronald M. Loeb Center for Alzheimer's disease and Nash Family Department of Neuroscience, Icahn School of Medicine at Mount Sinai, New York, NY, USA), Susan M. Resnick (Laboratory of Behavioral Neuroscience, National Institute on Aging, Baltimore, MD, USA), Liana S. Rosenthal (Department of Neurology, Johns Hopkins University Medical Center, Baltimore, MD, USA), Owen A. Ross (Department of Neuroscience, Mayo Clinic, Jacksonville, FL, USA; Department of Clinical Genomics, Mayo Clinic, Jacksonville, FL, USA), Clemens R. Scherzer (Harvard Medical School and Brigham & Women's Hospital, Boston, MA, USA), Geidy E. Serrano (Banner Sun Health Research Institute, Sun City, AZ, USA), Vikram G. Shakkottai (Department of Neurology, University of Texas Southwestern Medical Center, Dallas, TX, USA), Ellen Sidransky (Medical Genetics Branch, National Human Genome Research Institute, Bethesda, MD, USA), Toshiko Tanaka (Longitudinal Studies Section, National Institute on Aging, Baltimore, MD, USA), Nahid Tayebi (Medical Genetics Branch, National Human Genome Research Institute, Bethesda, MD, USA), Eric Topol (Scripps Research Translational Institute, Scripps Research, La Jolla, CA, USA), Ali Torkamani (Scripps Research Translational Institute, Scripps Research, La Jolla, CA, USA), Juan C. Troncoso (Department of Pathology [Neuropathology], Johns Hopkins University School of Medicine, Baltimore, MD, USA), Randy Woltjer (Department of Neurology, Oregon Health & Sciences University, Portland, OR, USA), Zbigniew K. Wszolek (Department of Neurology, Mayo Clinic Florida, Jacksonville, FL, USA), Sonja W. Scholz (Neurodegenerative Diseases Research Unit (National Institute of Neurological Disorders and Stroke, Bethesda, MD, USA; Department of Neurology, Johns Hopkins University Medical Center, Baltimore, MD, USA).

#### **Acknowledgments for International LBD Genomics Consortium members**

T.F. and K.F. report that samples provided by the National Centralized Repository for Alzheimer's Diseases and Related Dementias (NCRAD) were supported under a cooperative agreement grant (U24 AG021886). This study used tissue samples and data that were provided by the Johns Hopkins Morris K. Udall Center of Excellence for Parkinson's Disease Research (NIH P50 NS38377). The sample collection was in part supported by the Canadian Consortium on Neurodegeneration in Aging (E.R., S.E.B, M.M., Z.G.O.). We thank the Dementia with Lewy

Body Dementia Consortium (DLBC; <https://pdbp.ninds.nih.gov/Dementia-with-Lewy-Bodies-Consortium>), which was supported by the grants U01 NS100610 and P30 AG072959. Z.K.W. is partially supported by the Mayo Clinic Center for Regenerative Medicine, Mayo Clinic in Florida Focused Research Team Program, the gifts from The Sol Goldman Charitable Trust, and the Donald G. and Jodi P. Heeringa Family, the Haworth Family Professorship in Neurodegenerative Diseases fund, and The Albertson Parkinson's Research Foundation. We are grateful to the Banner Sun Health Research Institute Brain and Body Donation Program of Sun city, Arizona, for the provision of human brain tissue and data. The Brain and Body Donation Program is supported by the National Institute of Neurological Disorders and Stroke (U24 NS072026 National Brain and Tissue Resource for Parkinson's Disease and Related Disorders), the National Institute on Aging (P30 AG19610 Arizona Alzheimer's Disease Core Center), the Arizona Department of Health Services (contract 211002, Arizona Alzheimer's Research Center), the Arizona Biomedical Research Commission (contracts 4001, 0011, 05-901 and 1001 to the Arizona Parkinson's Disease Consortium) and the Michael J. Fox Foundation for Parkinson's Research. We are grateful to the Rush Alzheimer's Disease Center for providing brain tissue and DNA samples, which was supported by the grants P30 AG10161, R01 AG15819, R01 AG17917, U01AG46152, U01 AG61356. Samples from the National Centralized Repository for Alzheimer's Diseases and Related Dementias (NCRAD), which receives government support under a cooperative agreement grant (U24 AG021886) awarded by the National Institute on Aging (NIA), were used in this study. The National Alzheimer's Coordinating Center (NACC) database is funded by the NIA/NIH Grant U01 AG016976. NACC data are contributed by the NIA-funded ADCs: P30 AG019610 (PI Eric Reiman, MD), P30 AG013846 (PI Neil Kowall, MD), P50 AG008702 (PI Scott Small, MD), P50 AG025688 (PI Allan Levey, MD, PhD), P50 AG047266 (PI Todd Golde, MD, PhD), P30 AG010133 (PI Andrew Saykin, PsyD), P50 AG005146 (PI Marilyn Albert, PhD), P50 AG005134 (PI Bradley Hyman, MD, PhD), P30 AG062677 (PI Ronald Petersen, MD, PhD), P50 AG005138 (PI Mary Sano, PhD), P30 AG008051 (PI Thomas Wisniewski, MD), P30 AG013854 (PI M. Marsel Mesulam, MD), P30 AG008017 (PI Jeffrey Kaye, MD), P30 AG010161 (PI David Bennett, MD), P50 AG047366 (PI Victor Henderson, MD, MS), P30 AG010129 (PI Charles DeCarli, MD), P50 AG016573 (PI Frank LaFerla, PhD), P50 AG005131 (PI James Brewer, MD, PhD), P50 AG023501 (PI Bruce Miller, MD), P30 AG035982 (PI Russell Swerdlow, MD), P30 AG028383 (PI Linda Van Eldik, PhD), P30 AG053760 (PI Henry Paulson, MD, PhD), P30 AG010124 (PI John Trojanowski, MD, PhD), P50 AG005133 (PI Oscar Lopez, MD), P50 AG005142 (PI Helena Chui, MD), P30 AG012300 (PI Roger Rosenberg, MD), P30 AG049638 (PI Suzanne Craft, PhD), P50 AG005136 (PI Thomas Grabowski, MD), P50 AG033514 (PI Sanjay Asthana, MD, FRCP), P50 AG005681 (PI John Morris, MD), P50 AG047270 (PI Stephen Strittmatter, MD, PhD). We thank members of the North American Brain Expression Consortium (NABEC) for providing DNA samples derived from brain tissue. Brain tissue for the NABEC cohort was obtained from the Baltimore Longitudinal Study on Aging at the Johns Hopkins School of Medicine, and from the NICHD Brain and Tissue Bank for Developmental Disorders at the University of Maryland, Baltimore, MD, USA. We would like to thank the United Kingdom Brain Expression Consortium (UKBEC) for providing DNA samples. Tissue samples and associated clinical and neuropathological data were supplied by the Parkinson's UK Brain Bank, funded by Parkinson's UK, a charity registered in England and Wales (258197) and in Scotland (SC037554). We would like to thank the South West Dementia Brain Bank (SWDBB), their donors and donor's families for providing brain tissue for this study. Tissue for

this study was provided with support from the BDR program, jointly funded by the Alzheimer's Society UK and the Alzheimer's Society. The SWBB is further supported by BRACE (Bristol Research into Alzheimer's and Care of the Elderly).

**Conflict of interest statement for International LBD Genomic Consortium members:** ZKW is partially supported by the NIH/NIA and NIH/NINDS (1U19AG063911, FAIN: U19AG063911), Mayo Clinic Center for Regenerative Medicine, the gifts from the Donald G. and Jodi P. Heeringa Family, the Haworth Family Professorship in Neurodegenerative Diseases fund, and The Alberts Parkinson's Research Foundation. He serves as PI or Co-PI on Biohaven Pharmaceuticals, Inc. (BHV4157-206), Neurally, Inc. (NLY01-PD-1), and Vigil Neuroscience, Inc. (VGL101-01.002, PET tracer development protocol, Csf1r biomarker and repository project) grants. He serves as Co-PI of the Mayo Clinic APDA Center for Advanced Research and as an external advisory board member for the Vigil Neuroscience, Inc.

### International ALS/FTD Consortium

Robert H. Baloh<sup>1</sup>, Robert Bowser<sup>2</sup>, Alexis Brice<sup>3,4</sup>, James Broach<sup>5</sup>, William Camu<sup>6,7</sup>, Adriano Chiò<sup>8,9,10</sup>, John Cooper-Knock<sup>11</sup>, Carsten Drepper<sup>12</sup>, Vivian E. Drory<sup>13</sup>, Travis L. Dunckley<sup>14</sup>, Eva Feldman<sup>15</sup>, Pietro Fratta<sup>16</sup>, Glenn Gerhard<sup>14</sup>, Summer B. Gibson<sup>17</sup>, Jonathan D. Glass<sup>18</sup>, John A. Hardy<sup>19</sup>, Matthew B. Harms<sup>20</sup>, Terry D. Heiman-Patterson<sup>21,22</sup>, Lilja Jansson<sup>23</sup>, Janine Kirby<sup>11</sup>, Justin Kwan<sup>24</sup>, Hannu Laaksovirta<sup>23</sup>, John E. Landers<sup>25</sup>, Francesco Landi<sup>26</sup>, Isabelle Le Ber<sup>3,4</sup>, Serge Lumbroso<sup>27</sup>, Daniel JL. MacGowan<sup>28</sup>, Nicholas J. Maragakis<sup>29</sup>, Kevin Mouzat<sup>27</sup>, Liisa Myllykangas<sup>30</sup>, Richard W. Orrell<sup>31</sup>, Lyle W. Ostrow<sup>22</sup>, Roger Pamphlett<sup>32</sup>, Erik Pioro<sup>33</sup>, Stefan M. Pulst<sup>17</sup>, John M. Ravits<sup>34</sup>, Wim Robberecht<sup>35</sup>, Ekaterina Rogaeva<sup>36</sup>, Jeffrey D. Rothstein<sup>29</sup>, Michael Sendtner<sup>37</sup>, Pamela J. Shaw<sup>11</sup>, Katie C. Sidle<sup>19</sup>, Zachary Simmons<sup>38</sup>, Thor Stein<sup>39</sup>, David J. Stone<sup>40</sup>, Pentti J. Tienari<sup>23</sup>, Bryan J. Traynor<sup>41,29</sup>, Juan C. Troncoso<sup>42</sup>, Miko Valori<sup>23</sup>, Philip Van Damme<sup>35,43</sup>, Vivianna M. Van Deerlin<sup>44</sup>, Ludo Van Den Bosch<sup>35</sup>, Lorne Zinman<sup>45</sup>

<sup>1</sup>Department of Neurology, Cedars-Sinai Medical Center, Los Angeles, CA, USA

<sup>2</sup>Division of Neurology, Barrow Neurological Institute, Phoenix, AZ, USA

<sup>3</sup>Centre de Recherche de l'Institut du Cerveau et de la Moelle épinière, Université Pierre et Marie Curie, Paris, France

<sup>4</sup>INSERM U975, Paris, France

<sup>5</sup>Department of Biochemistry, Penn State College of Medicine, Hershey, PA, USA

<sup>6</sup>The Institute for Neurosciences of Montpellier, INSERM UMR1051, Saint Eloi Hospital, Montpellier, France

<sup>7</sup>Department of Neurology, Gui-de-Chauliac Hospital, Montpellier, France

<sup>8</sup>'Rita Levi Montalcini' Department of Neuroscience, University of Turin, Via Verdi 8, Turin, Italy

<sup>9</sup>Azienda Ospedaliero Universitaria Città della Salute e della Scienza, Corso Bramante, 88, Turin, Italy

<sup>10</sup>Institute of Cognitive Sciences and Technologies, C.N.R., Via S. Martino della Battaglia, 44, Rome, Italy

<sup>11</sup>Department of Neuroscience, University of Sheffield, Sheffield, UK

<sup>12</sup>Institute for Clinical Neurobiology, University of Würzburg, Würzburg, Germany

<sup>13</sup>Department of Neurology, Tel-Aviv Sourasky Medical Center, Tel-Aviv, Israel

- <sup>14</sup>Department of Pathology, Penn State College of Medicine, Hershey, PA, USA
- <sup>15</sup>Department of Neurology, University of Michigan, 1500 E Medical Center Dr, Ann Arbor, MI, USA
- <sup>16</sup>Sobell Department of Motor Neuroscience and Movement Disorders, Institute of Neurology, University College London, London, UK
- <sup>17</sup>Department of Neurology, University of Utah School of Medicine, 175 North Medical Drive East, Salt Lake City, UT, USA
- <sup>18</sup>Department of Neurology, Emory University School of Medicine, Atlanta, GA, USA
- <sup>19</sup>Department of Molecular Neuroscience and Reta Lila Weston Laboratories, Institute of Neurology, University College London, London, UK
- <sup>20</sup>Department of Neurology, Columbia University, New York, NY, USA
- <sup>21</sup>Department of Neurology, Drexel University College of Medicine, Philadelphia, PA, USA
- <sup>22</sup>Department of Neurology, Temple University, 7602 Central Ave, Philadelphia, PA, USA
- <sup>23</sup>Department of Neurology, University of Helsinki, Helsinki, Finland
- <sup>24</sup>Neurodegeneration Disorders Clinic, Office of the Clinical Director, National Institute of Neurological Disorders and Stroke, 10 Center Drive, Bethesda, MD, USA
- <sup>25</sup>Department of Neurology, University of Massachusetts Medical School, Worcester, MA, USA
- <sup>26</sup>Department of Geriatrics, Neurosciences and Orthopedics, Center for Geriatric Medicine, Catholic University of Sacred Heart, Rome, Italy
- <sup>27</sup>Service de Biochimie, CHU de Nîmes, Nîmes, France
- <sup>28</sup>Neuromuscular Division and ALS Center, Beth Israel Medical Center, Albert Einstein College of Medicine, New York, NY, USA
- <sup>29</sup>Department of Neurology, Johns Hopkins University, Baltimore, MD, USA
- <sup>30</sup>Department of Pathology, University of Helsinki and HUS Diagnostic Center, Helsinki University Hospital (LM), Helsinki, Finland
- <sup>31</sup>Department of Clinical Neuroscience, Institute of Neurology, University College London, London, UK
- <sup>32</sup>Discipline of Pathology, Brain and Mind Centre, University of Sydney, Camperdown, Australia
- <sup>33</sup>Department of Neurology, Cleveland Clinic, Cleveland, OH, USA
- <sup>34</sup>Department of Neuroscience, Experimental Neurology and Leuven Research Institute for Neuroscience and Disease, University of California San Diego, 9500 Gilman Drive, La Jolla, CA, USA
- <sup>35</sup>Department of Neurosciences, Experimental Neurology and Leuven Research Institute for Neuroscience and Disease, University of Leuven, Leuven, Belgium
- <sup>36</sup>Division of Neurology, Tanz Centre for Research of Neurodegenerative Diseases and Toronto Western Hospital, University of Toronto, Toronto, Canada
- <sup>37</sup>Department of Neurology, Institute for Clinical Neurobiology, University of Würzburg, Würzburg, Germany
- <sup>38</sup>Department of Neurology, Penn State College of Medicine, Hershey, PA, USA
- <sup>39</sup>Department of Pathology and Laboratory Medicine, Boston University School of Medicine, Boston, MA, USA
- <sup>40</sup>Cerevel Therapeutics, Cambridge, MA, USA
- <sup>41</sup>Neuromuscular Diseases Research Section, Laboratory of Neurogenetics, National Institute on Aging, Bethesda, MD, USA
- <sup>42</sup>Clinical and Neuropathology Core, Johns Hopkins University, Baltimore, MD, USA



<sup>43</sup>VIB, Center for Brain & Disease Research, Laboratory of Neurobiology, University of Leuven, Leuven, Belgium

<sup>44</sup>Department of Pathology and Laboratory Medicine, University of Pennsylvania, Philadelphia, PA, USA

<sup>45</sup>Division of Neurology, Sunnybrook Health Sciences Centre, University of Toronto, Toronto, Canada

## AMP-PD Acknowledgments

Data used in the preparation of this article were obtained from the Accelerating Medicine Partnership (AMP) Parkinson's Disease (AMP PD) Knowledge Platform. For up-to-date information on the study, visit <https://www.amp-pd.org>. The AMP PD program is a public-private partnership managed by the Foundation for the National Institutes of Health and funded by the National Institute of Neurological Disorders and Stroke (NINDS) in partnership with the Aligning Science Across Parkinson's (ASAP) initiative; Celgene Corporation, a subsidiary of Bristol-Myers Squibb Company; GlaxoSmithKline plc (GSK); The Michael J. Fox Foundation for Parkinson's Research; Pfizer Inc.; Sanofi US Services Inc.; and Verily Life Sciences. ACCELERATING MEDICINES PARTNERSHIP and AMP are registered service marks of the U.S. Department of Health and Human Services. Clinical data and biosamples used in preparation of this article were obtained from the (i) Michael J. Fox Foundation for Parkinson's Research (MJFF) and National Institutes of Neurological Disorders and Stroke (NINDS) BioFIND study, (ii) Harvard Biomarkers Study (HBS), (iii) National Institute on Aging (NIA) International Lewy Body Dementia Genetics Consortium Genome Sequencing in Lewy Body Dementia Case-control Cohort (LBD), (iv) MJFF LRRK2 Cohort Consortium (LCC), (v) NINDS Parkinson's Disease Biomarkers Program (PDBP), (vi) MJFF Parkinson's Progression Markers Initiative (PPMI). BioFIND is sponsored by The Michael J. Fox Foundation for Parkinson's Research (MJFF) with support from the National Institute for Neurological Disorders and Stroke (NINDS). The BioFIND Investigators have not participated in reviewing the data analysis or content of the manuscript. For up-to-date information on the study, visit [michaeljfox.org/biofind](http://michaeljfox.org/biofind). Genome sequence data for the Lewy body dementia case-control cohort were generated at the Intramural Research Program of the U.S. National Institutes of Health. The study was supported in part by the National Institute on Aging (program #: 1ZIAAG000935) and the National Institute of Neurological Disorders and Stroke (program #: 1ZIANS003154). The Harvard Biomarker Study (HBS) is a collaboration of HBS investigators [full list of HBS investigators found at <https://www.bwhparkinsoncenter.org/biobank/>] and funded through philanthropy and NIH and Non-NIH funding sources. The HBS Investigators have not participated in reviewing the data analysis or content of the manuscript. Data used in preparation of this article were obtained from The Michael J. Fox Foundation sponsored LRRK2 Cohort Consortium (LCC). The LCC Investigators have not participated in reviewing the data analysis or content of the manuscript. For up-to-date information on the study, visit <https://www.michaeljfox.org/biospecimens>). PPMI is sponsored by The Michael J. Fox Foundation for Parkinson's Research and supported by a consortium of scientific partners: [list the full names of all of the PPMI funding partners found at <https://www.ppmi-info.org/about-ppmi/who-we-are/study-sponsors>]. The PPMI investigators have not participated in reviewing the data analysis or content of the manuscript. For up-to-date information on the study, visit [www.ppmi-info.org](http://www.ppmi-info.org). The Parkinson's Disease Biomarker Program (PDBP) consortium is supported by the National Institute of Neurological Disorders and Stroke (NINDS) at the

National Institutes of Health. A full list of PDBP investigators can be found at <https://pdbp.ninds.nih.gov/policy>. The PDBP investigators have not participated in reviewing the data analysis or content of the manuscript.

### **Acknowledgments for the PDBP**

Samples from the NINDS BioSEND, which receives government support under a cooperative agreement grant (U24 NS095871) awarded by the National Institute of Neurological Disorders and Stroke (NINDS), were used in the study. We thank contributors who collected samples used in this study, as well as patients and their families, whose help and participation made this work possible. Data and biospecimens used in preparation of this manuscript were obtained from the Parkinson's Disease Biomarkers Program (PDBP) Consortium, part of the National Institute of Neurological Disorders and Stroke at the National Institutes of Health. The PDBP Investigators have not participated in reviewing the data analysis or content of the manuscript.
